# Supplementary material for: A novel natural product inspired scaffold with robust neurotrophic, neurogenic and neuroprotective action
Source: PubMed Central journal article supplement (PMC4585672; doi:10.1038/srep14134), 2015-09-21
Supplement: srep14134-s1.pdf [file srep14134-s1.pdf]

**A novel natural product inspired scaffold with robust neurotrophic, neurogenic and neuroprotective action**

Sumana Chakravarty<sup>1\*</sup>, Swati Maitra<sup>1#</sup>, R Gajendra Reddy<sup>1#</sup>, Tapatee Das<sup>1#</sup>, Priya Jhelum<sup>1</sup>, Scherazad Kootar<sup>2</sup>, Wenson D Rajan<sup>2</sup>, Anumita Samanta<sup>1</sup>, Ramesh Samineni<sup>3</sup>, Srihari Pabbaraja<sup>3</sup>, Steven G Kernie<sup>4</sup>, Goverdhan Mehta<sup>5</sup>, Arvind Kumar<sup>2</sup>

<sup>1</sup>Chemical Biology and <sup>3</sup>Natural Products Chemistry, CSIR- Indian Institute of Chemical Technology, Tarnaka, Uppal Road, Hyderabad 500007, India.

<sup>2</sup>CSIR- Centre for Cellular and Molecular Biology, Habsiguda, Uppal Road, Hyderabad 500007, India.

<sup>4</sup>Department of Pediatrics and Department of Pathology and Cell Biology, College of Physicians and Surgeons, Columbia University, New York, NY 10032, USA.

<sup>5</sup>School of Chemistry, University of Hyderabad, Hyderabad-500046, India.

# These authors contributed equally to this work.

**Suppl fig 1.**

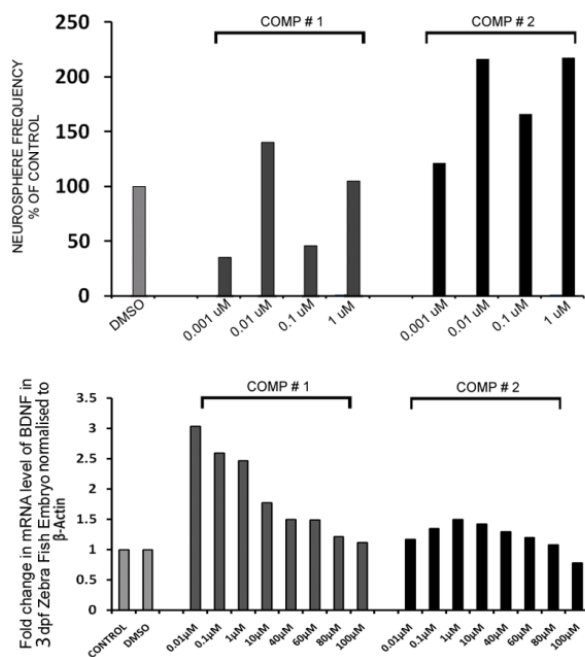

**Supplementary fig.1: Dose titration for ex vivo and in vivo experiments.** Upper panel showed the neurosphere assay by using mouse hippocampal precursor cell populations subjected to different concentrations of the compounds from [0.001 μM to 1.0 μM]; whereas lower panel showed Bdnf gene expression level in Zebrafish embryos treated with different concentrations of the compounds [0.01 μM to 100 μM]. Please note that the most optimum concentrations [0.01 μM for mouse primary culture, 1.0 μM for zebrafish embryo experiments] were selected for main experiment. To decide the exact dose, similar methods were followed in other experiments too.

Suppl fig 2.

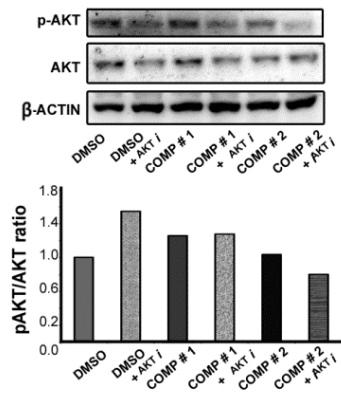

**Supplementary fig.2: Immunoblot for pAKT and AKT.** Expression levels of p-AKT/ACT in Neuro2A cells treated with comp #1, #2 (0.01 $\mu$ M), pretreated with or without AKT inhibitor (LY294002) (20 $\mu$ M).

**Suppl fig 3.**

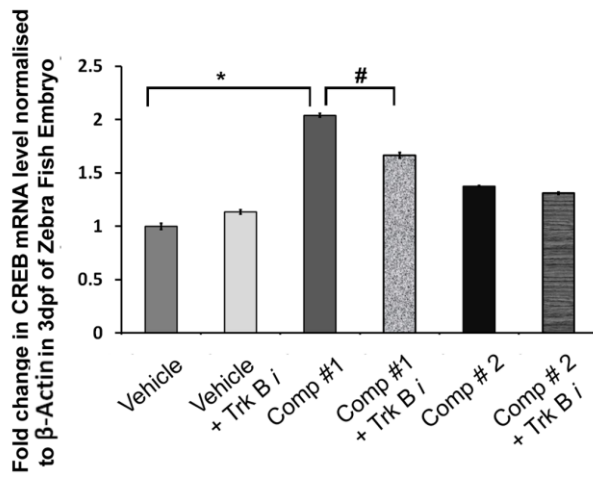

**Supplementary fig.3: RT-PCR data for Creb upon Trk B inhibitor treatment.** Shown here is the graphical representation for the mRNA expression level of Creb normalized with  $\beta$ -Actin in 3 dpf of Zebrafish embryo upon treatment with/without Trk B inhibitor ANA-12.

Suppl fig 4.

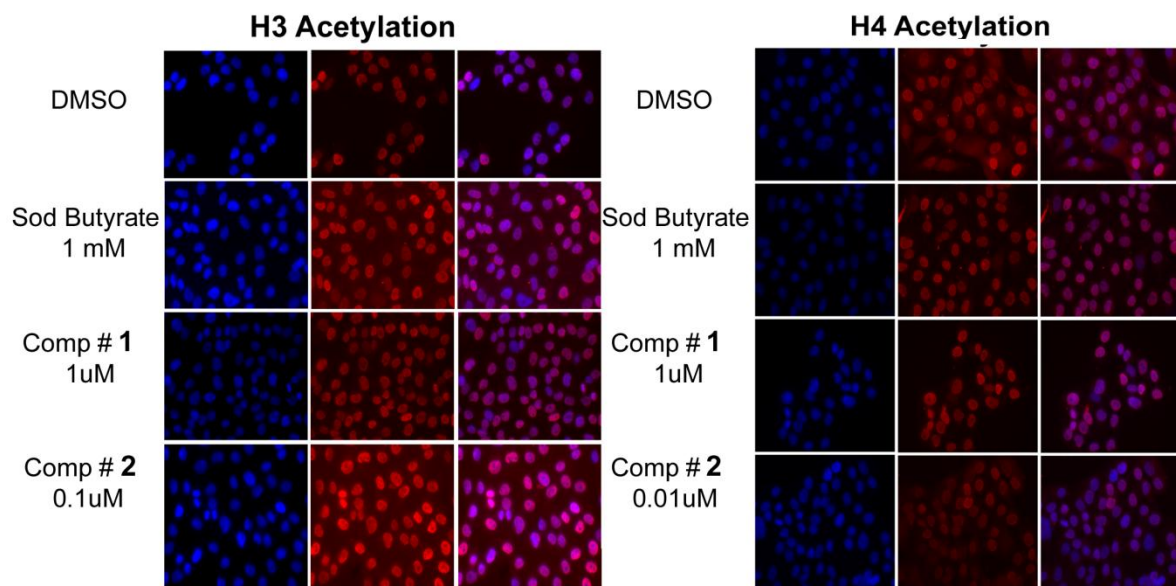

**Supplementary fig.4: Immunocytochemistry for acetyl H3, H4 and DAPI.** Shown are the representative images for Acetyl H3, H4 and DAPI staining in IMR-32 cells treated with Vehicle (DMSO 1%), Sodium butyrate (1mM), Comp#1 (1μM), Comp#2 (0.1, 0.01μM).
